# Supplementary material
Source: PubMed Central journal article supplement (PMC8543200)
Supplement: archdischild-2020-321260supp001.pdf [file archdischild-2020-321260supp001.pdf]

**APPENDIX:**

Table 1: Demographics of participants

| <b>Demographics of participants</b> | <b>Proportion, n</b> |
|-------------------------------------|----------------------|
| Sex of care giver                   |                      |
| Female                              | 14                   |
| Male                                | 1                    |
| Age range of care giver             |                      |
| 25-29                               | 4                    |
| 30-34                               | 4                    |
| 35-40                               | 5                    |
| 40-45                               | 0                    |
| 45 plus                             | 2                    |
| Ethnicity                           |                      |
| Asian                               | 7                    |
| Afro-Caribbean                      | 1                    |
| White British                       | 1                    |
| White other                         | 6                    |
| Child's age range                   |                      |
| 0-1 month                           | 3                    |
| 1-3months                           | 3                    |
| 3month-12 months                    | 3                    |
| 1-5 years                           | 1                    |
| 5-10 years                          | 2                    |
| 10-16years                          | 3                    |
| Reason for child's admission        |                      |
| Suspected sepsis                    | 7                    |
| Other infection                     | 4                    |
| Fracture                            | 1                    |
| Mental Health                       | 1                    |
| Other                               | 2                    |
